# Supplementary material for: Metabolomics Evaluation of Serum Markers for Cachexia and Their Intra-Day Variation in Patients with Advanced Pancreatic Cancer
Source: PubMed Central journal article supplement (PMC4239056; doi:10.1371/journal.pone.0113259), 2014-11-20
Supplement: pone.0113259.s005.pdf [file pone.0113259.s005.pdf]

審査結果通知書

平成21年10月15日

申請者  
南 博信 殿

神戸大学大学院医学研究科長

高 井 義 美

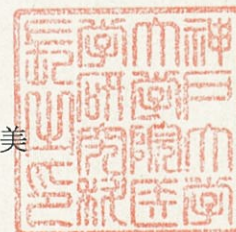

研究課題 膵臓がん患者における悪液質とそれに関わる代謝産物の  
日内変動に関するメタボローム解析

研究実施責任者  
所属職氏名 腫瘍・血液内科学 特命教授 南 博信

上記の実施計画について、審査の結果、下記のとおり判定したので通知します。

記

| 判定  | 承認 |
|-----|----|
| 理由等 |    |
